# Supplementary material for: Functionalized Fullerene Potentially Inhibits SARS-CoV-2 Infection by Modulating Spike Protein Conformational Changes
Source: MDPI journal article supplement (doi:10.3390/ijms241914471), 2023-09-23
Supplement: s1 [file s1]

Supplementary Materials for

# Functionalized Fullerene Potentially Inhibits SARS-CoV-2 Infection by Modulating Spike Protein Conformational Changes

Kaifeng Liu <sup>1,†</sup>, Fangfang Guo <sup>2,†</sup>, Yingying Ma <sup>1</sup>, Xiangyu Yu <sup>2</sup>, Xueqi Fu <sup>2</sup>, Wannan Li <sup>2,\*</sup> and Weiwei Han <sup>1,\*</sup>

<sup>1</sup> Key Laboratory for Molecular Enzymology and Engineering of Ministry of Education, School of Life Sciences, Jilin University, Changchun 130012, China; liukf1220@jlu.edu.cn (K.L.); mayy2920@mails.jlu.edu.cn (Y.M.)

<sup>2</sup> Edmond H. Fischer Signal Transduction Laboratory, School of Life Sciences, Jilin University, Changchun 130012, China; guoff15@mails.jlu.edu.cn (F.G.); yuxy1321@mails.jlu.edu.cn (X.Y.); fuxq@jlu.edu.cn (X.F.)

\* Correspondence: liwannan@jlu.edu.cn (W.L.); weiweihan@jlu.edu.cn (W.H.)

† These authors contributed equally to this work.

**This PDF file includes:**

Figures S1 to S4

**Figure S1**

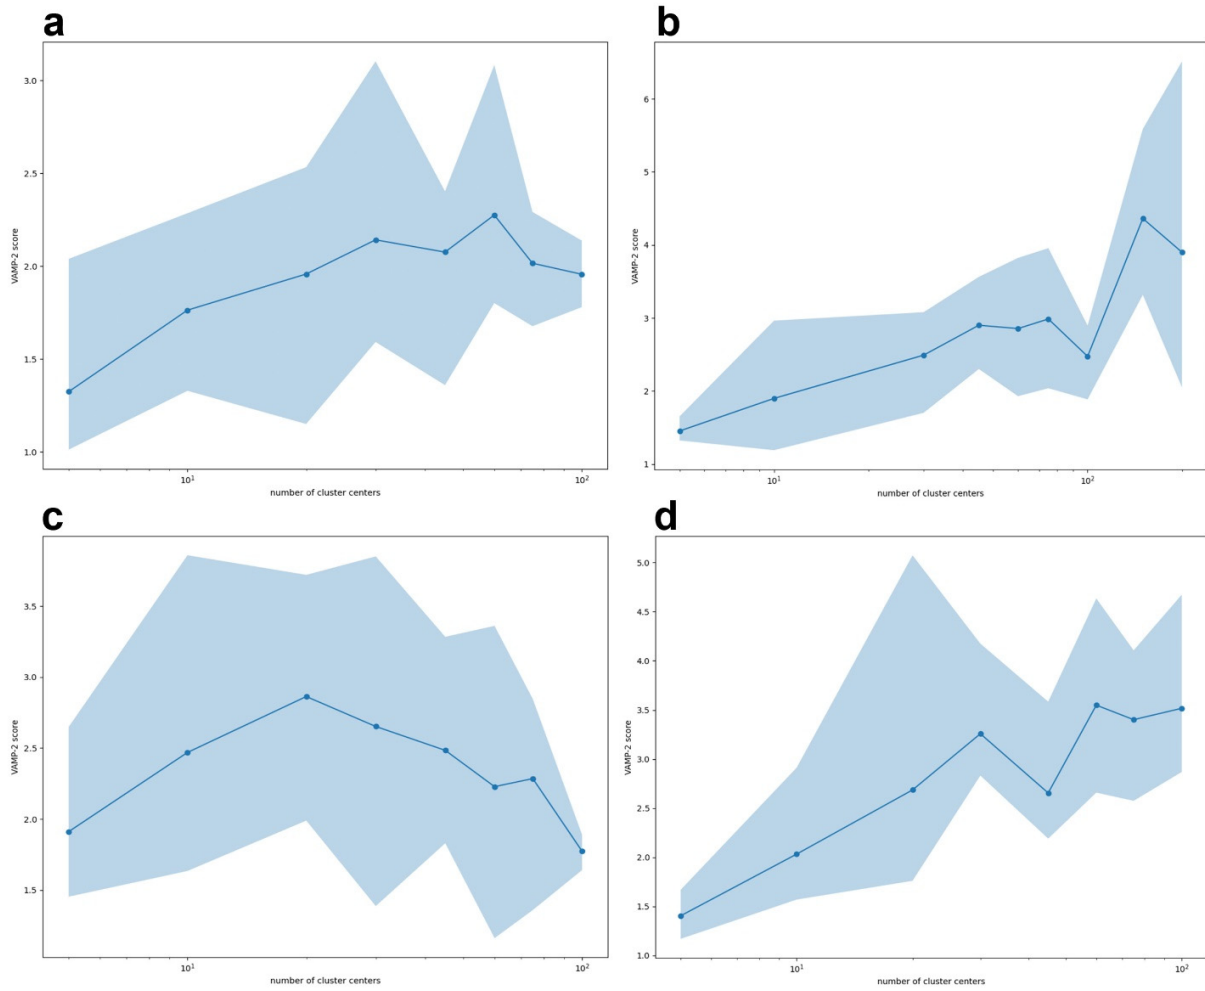

**Figure S1.** VAMP2 scores for different number of clusters centers. **a** The highest VAMP2 score for the WT system corresponds to  $k=60$ . **b** The highest VAMP2 score for the WTF system corresponds to  $k=150$ . **c** The highest VAMP2 score for the XBB system corresponds to  $k=20$ . **d** The highest VAMP2 score for the XBBF system corresponds to  $k=30$ .

**Figure S2**

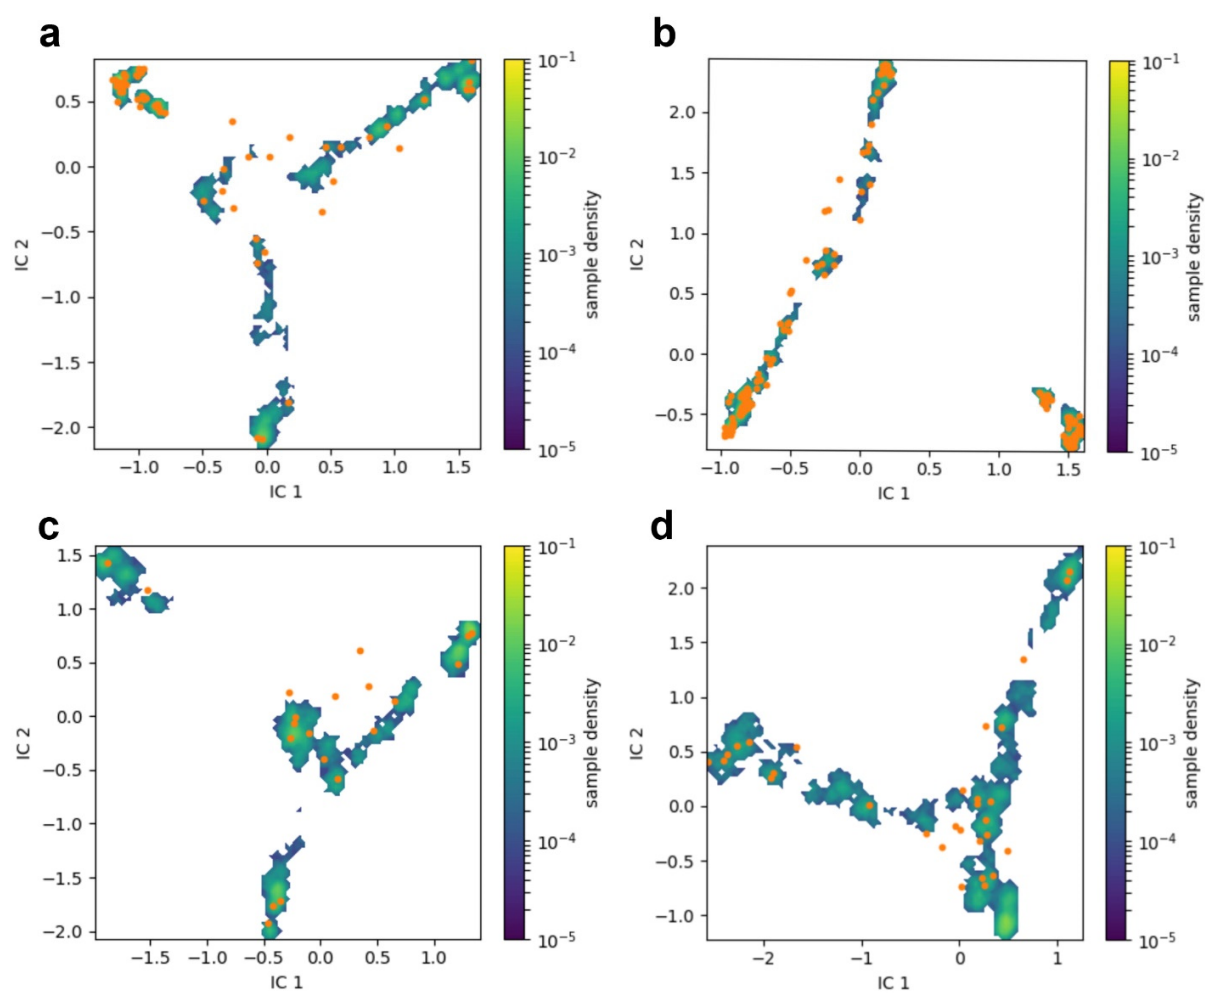

**Figure S2.** K-means clustering results of TICA-reduced trajectories data. **a** Clustering result of WT. **b** Clustering result of WTF. **c** Clustering result of XBB. **d** Clustering result of XBBF.

**Figure S3**

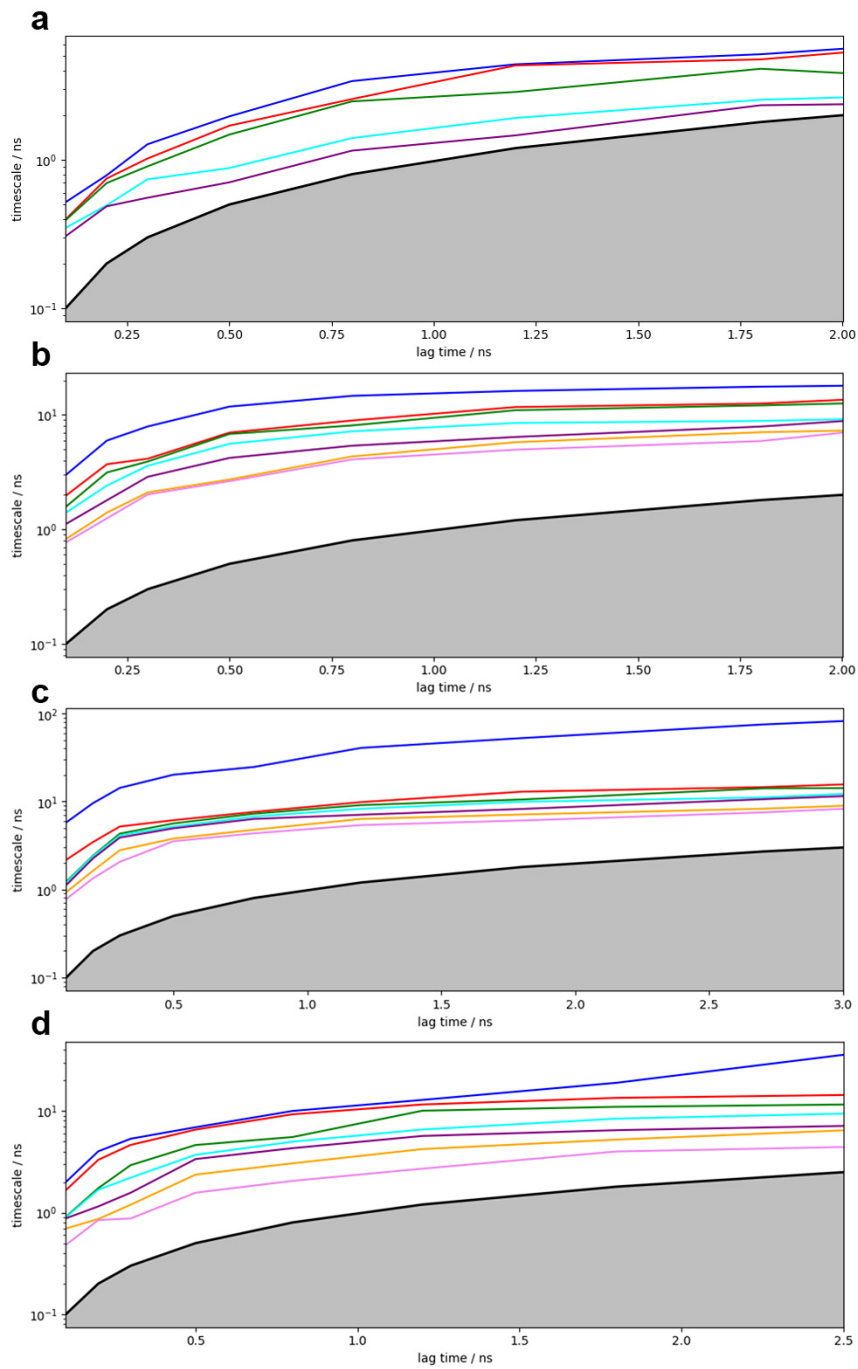

**Figure S3.** Determination of lag time, time scale reaches stability after 0.8 ns. **a** Lag time of WT. **b** Lag time of WTF. **c** Lag time of XBB. **d** Lag time of XBBF.

**Figure S4**

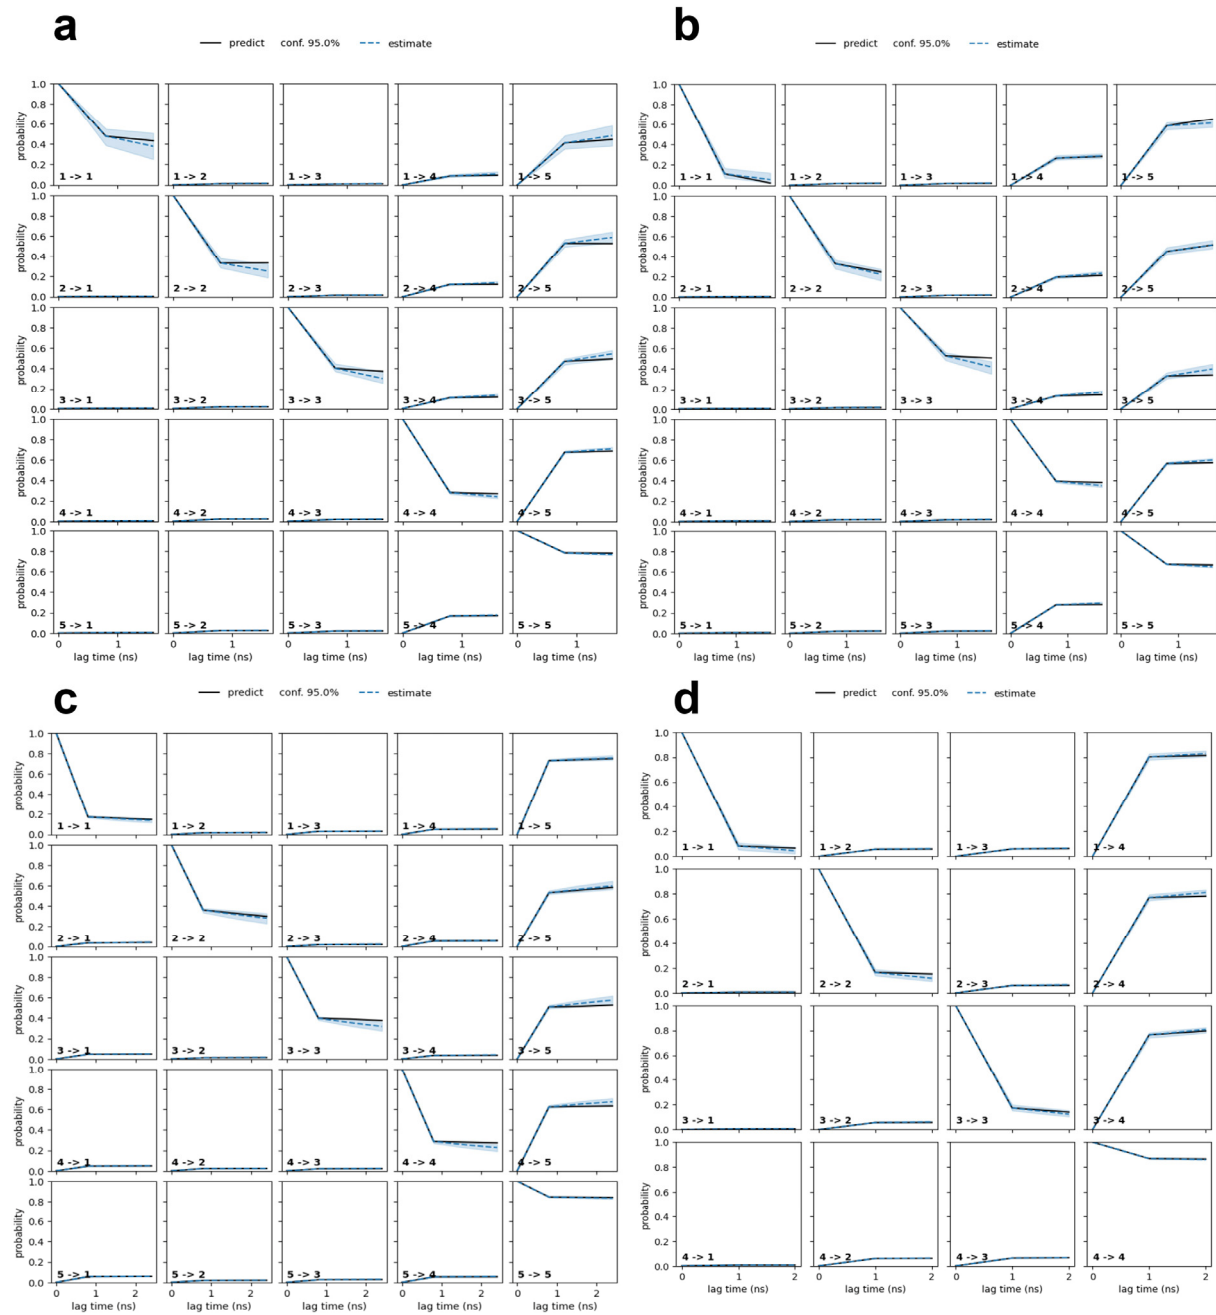

**Figure S4.** Results of Chapman-Kolmogorov tests for dividing systems into metastable states, a nearly agreement were observed for all the lag time, indicating the high Markovianity of the microstates, these metastable states are reasonable choices for our MSM. **a** WT. **b** WTF. **c** XBB. **d** XBBF.
